# Supplementary material for: Plakoglobin phosphorylation at serine 665 is capable of stabilizing cadherin-mediated adhesion in keratinocytes
Source: JCI journal article supplement (doi:10.1172/jci.insight.190359), 2026-02-08

Fig. S2A : anti Pg-IP, uncropped blots

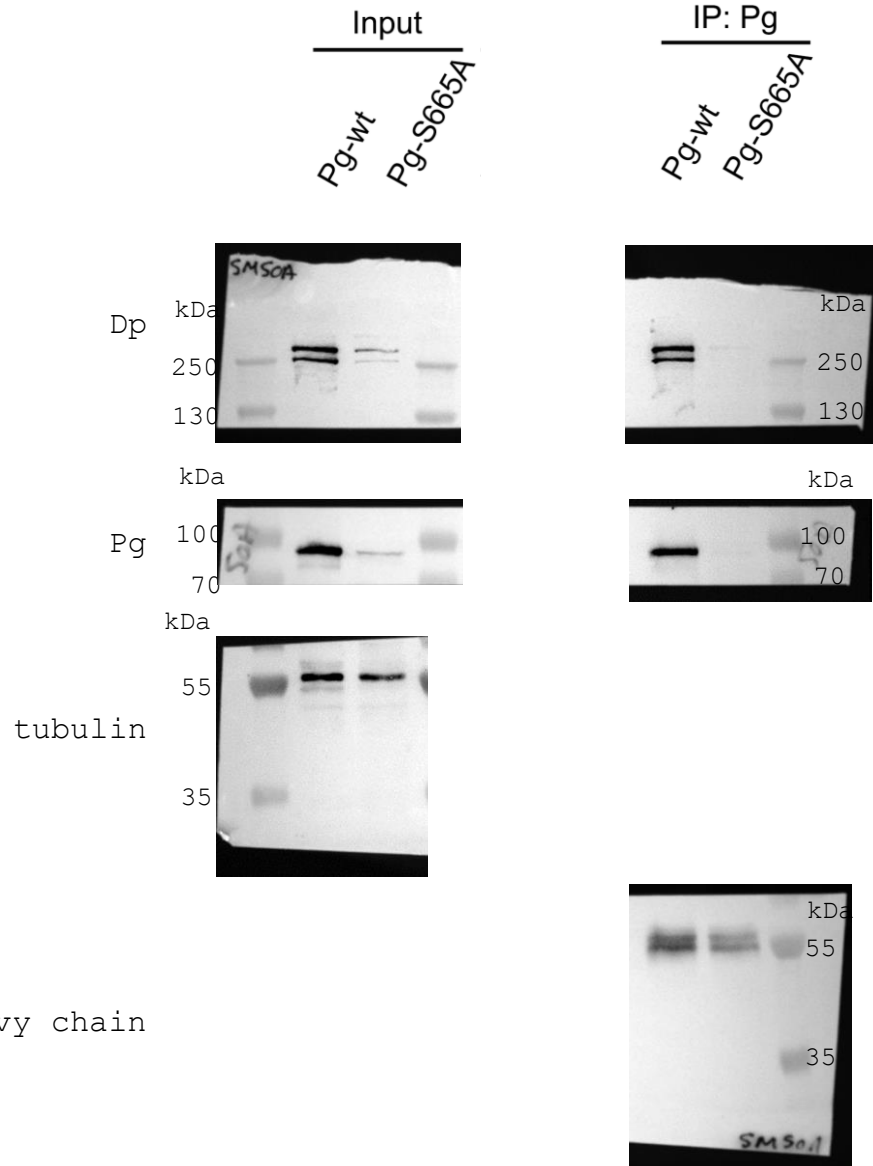

high exposure:

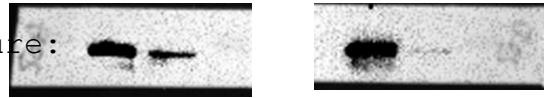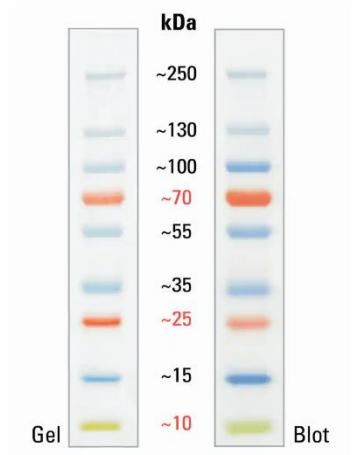

Fig.S3 F : Wb murine wt keratinocytes treated 24h with apr or F/R . uncropped blots

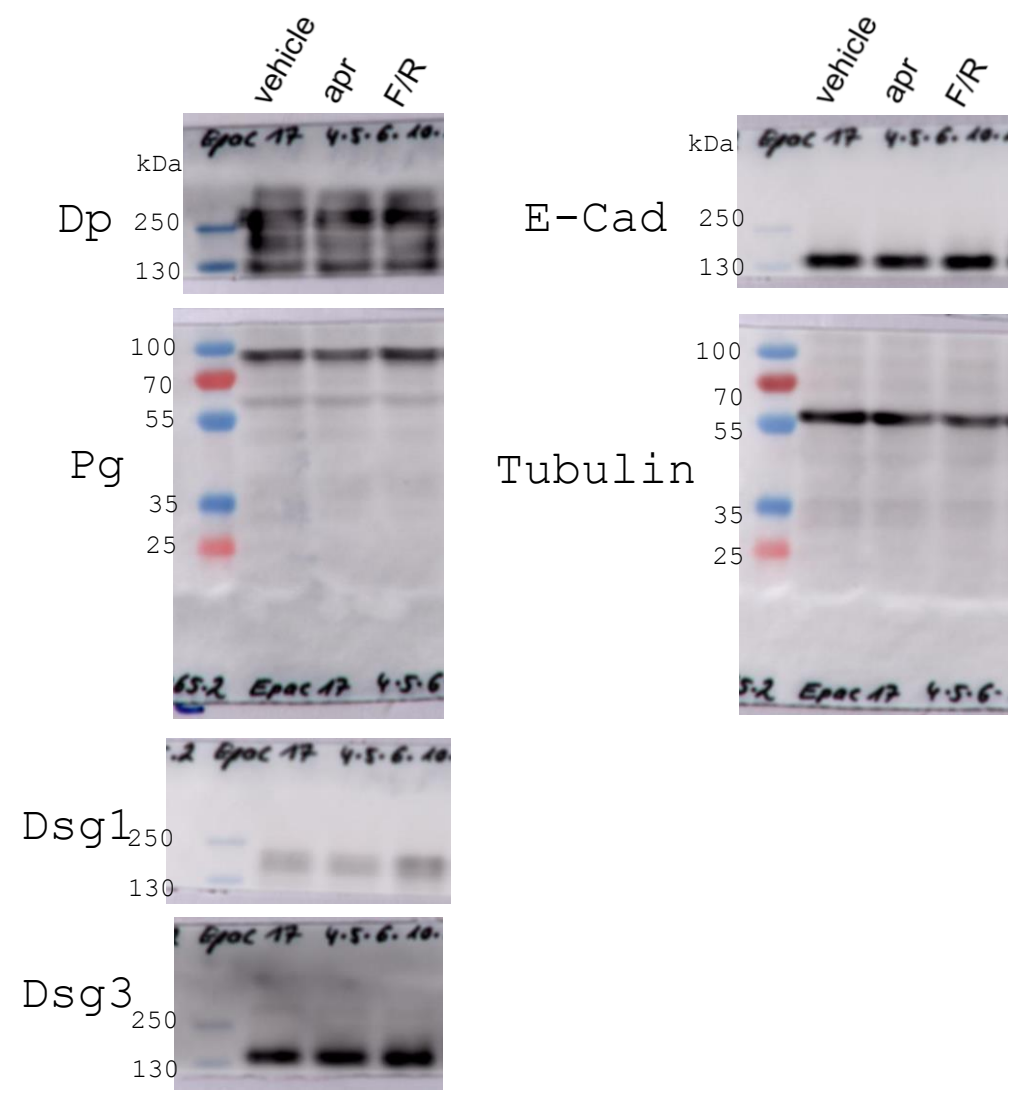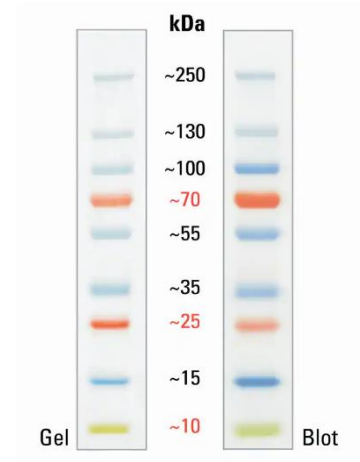

Supplement: sd2 [file 2]
